# Supplementary material
Source: Elsevier journal article supplement (https://discovery-pp.ucl.ac.uk/1452041/5/mmc4.pdf)
Supplement: mmc4 [file mmc4.pdf]

**Table 5. Comparison of Clinical Characteristics, Genotype, and Allele Frequency of the Prevalent Variants between Childhood-onset and Adult-onset Stargardt Disease with two or more disease-causing *ABCA4* variants.**

|                                            | Childhood-onset Stargardt disease (n=34) |              |                               |                |                       |                          | Adult-onset Stargardt disease (n=64) |                            |                              |                               |                       |                          |  |
|--------------------------------------------|------------------------------------------|--------------|-------------------------------|----------------|-----------------------|--------------------------|--------------------------------------|----------------------------|------------------------------|-------------------------------|-----------------------|--------------------------|--|
| Median age of onset (yrs)                  | 8.5 (3-14)                               |              |                               |                |                       |                          | 27.0 (17-65)                         |                            |                              |                               |                       |                          |  |
| Median age at examination (yrs)            | 11.5 (7-16)                              |              |                               |                |                       |                          | 44.0 (21-71)                         |                            |                              |                               |                       |                          |  |
| Median LogMAR VA of the right eye          | 0.79 (0.18-1.30)                         |              |                               |                |                       |                          | 1.00 (-0.08-2.00)                    |                            |                              |                               |                       |                          |  |
|                                            | Total (n=32)                             |              |                               |                |                       |                          | Total (n=64)                         |                            |                              |                               |                       |                          |  |
|                                            | Grade 1<br>1                             | Grade 2<br>1 | Grade 3a<br>8                 | Grade 3b<br>22 | Grade 3c<br>0         | Grade 4<br>0             | Grade 1<br>0                         | Grade 2<br>6               | Grade 3a<br>4                | Grade 3b<br>34                | Grade 3c<br>12        | Grade 4<br>8             |  |
| Fundus Appearance                          | Macular<br>2                             |              | Flecks<br>Peripheral<br>21    |                | No flecks<br>9        |                          | Macular<br>14                        |                            | Flecks<br>Peripheral<br>39   |                               | No flecks<br>11       |                          |  |
|                                            |                                          |              | Pigmentation<br>2             |                | No pigmentation<br>30 |                          |                                      |                            | Pigmentation<br>29           |                               | No pigmentation<br>35 |                          |  |
| Autofluorescence Pattern                   | Type 1<br>8                              |              | Total (n=29)<br>Type 2<br>21  |                |                       | Type 3<br>0              |                                      | Type 1<br>20               |                              | Total (n=62)<br>Type 2<br>33  |                       | Type 3<br>9              |  |
| OCT, CFT (µm) of the right eye             | Total (n=19)<br>61.0 (33-138)            |              |                               |                |                       |                          | Total (n=33)<br>81.0 (20-297)        |                            |                              |                               |                       |                          |  |
| ERG group                                  | Group 1<br>7                             |              | Total (n=18)<br>Group 2<br>1  |                | Group 3<br>10         |                          | Group 1<br>34                        |                            | Total (n=59)<br>Group 2<br>7 |                               | Group 3<br>18         |                          |  |
| Genotype group classification              | Group A<br>7                             |              | Total (n=34)<br>Group B<br>15 |                |                       | Group C<br>12            |                                      | Group A<br>3               |                              | Total (n=64)<br>Group B<br>26 |                       | Group C<br>35            |  |
| Frequencies of the most prevalent variants | c.5461-10T>C<br>8 (11.8%)                |              | p.Gly1961Glu<br>4 (5.9%)      |                |                       | p.Cys1490Tyr<br>4 (5.9%) |                                      | p.Gly1961Glu<br>16 (12.5%) |                              | p.Gly863Ala<br>13 (10.1%)     |                       | p.Leu2027Phe<br>8 (6.3%) |  |

---

AF type = autofluorescence type; CFT = central foveal thickness; ERG = electroretinogram; LogMAR VA = logarithm of the minimum angle of resolution visual acuity; OCT = optical coherence tomography.

In order to investigate the differences between the patients with childhood-onset Stargardt Disease (STGD) and those with adult-onset STGD, clinical and molecular genetic data of patients with adult-onset STGD ascertained at Moorfields Eye Hospital were reviewed. The comparison group consisted of all patients who had adult-onset STGD (older than 17 years old), and two or more disease-causing *ABCA4* variants. For the purpose of this comparison, 34 patients with childhood-onset STGD and two or more disease-causing *ABCA4* variants were selected.
